# Supplementary material for: A meta-analysis of the association between physical demands of unpaid domestic work and back pain among women
Source: Research Square preprint supplement (doi:10.21203/rs.3.rs-131819/v1), 2020-12-22
Supplement: Supplementary file 1 [file de9b571d21b78fa6583d5246.docx]

| Additional File, Table 1. Characteristics of Included Studies | | | | | | | | | |
| --- | --- | --- | --- | --- | --- | --- | --- | --- | --- |
| Author, year, and (country of study) | Type of Study | Population | Demographics | % of women | Results stratified by gender | Type of Job Tasks specified | Confounders Adjusted | Description and measures Exposures | Description and Measures of outcome |
| Alzahrani 2019[1]  (England & Scotland) | Cross-sectional Study | Adults >/ 16 years. 32,087 women | Mean age=45.7years,  BMI, smoking status, education, ethnicity, employment status | Yes  50% | No | Tidying, cleaning, scrubbing and gardening | Age, Sex, smoking status, ethnicity, BMI, education, occupation, employment status, other physical activities (exercise) | OR, Low (<3.8) versus high (>=12.1) domestic activity (MET h/week). Low versus high/**Work intensity** | Chronic back pain |
| Ahlgren, 2012[2]  (Sweden) | Cross-sectional Study | Working women in blue-collar (253) and white-collar jobs (262) | Mean age=40.7 years (white collar), 44.3 years (blue-collar), education, family situation, employment status and working hours | Yes | Yes | Cleaning, carrying children, coking, washing clothes, regular shopping, washing dishes | Age, smoking, number of children, employment hours, blue collar work | OR, High versus low Engagement in domestic chores and caring for children/ **Work frequency** | Three months prevalence of Self-reported low back disorders |
| Fong, 2008[3] (Hong Kong) | Cross-sectional Study | 153 full time homemakers | Mean age=41.7 years, marital status, education, years in household work, number of children | Yes, 100 | NA | Carrying children, washing clothes, washing dishes, shopping | Demographics, other daily recreational activities | OR, Domestic activity (mean hours spent shopping& washing utensils)/ **Time** | 12-months prevalence of Self-perceived discomfort in the lower back |
| Geere, 2018[4]  (South Africa, Ghana and Vietnam) | Cross-sectional Survey | 789 women | Mean age= 29.7 years, type of water supply, general health functioning and disability | Yes  53.6 | No | Carrying water | Age and Sex | RR, History of water carriage (No history versus currently carries water)/**Biomechanical** | Upper back pain |
| Habib, 2012[5] (Lebanon) | Cross-sectional Study | 331 full time homemakers | Age, education, household income, size, number of children, smoking status | Yes, 100 | NA | Cleaning, carrying children, cooking, shopping | Age, education, paid work, income, household size | OR, working occasionally in Non-neutral versus Working all the time in Non-neutral postures (bending, kneeling and squatting) /**Biomechanical** | 12-months prevalence of low back pain |
| Habib, 2015[6] (Bangladesh) | Cross-sectional Study | 73 housewives | Age=20-45 years, education, | Yes, 100 | NA | Cooking, washing dishes, sweeping, collecting /carrying water. | None | OR, Trunk Flexion >45 degrees for more than 2 hours total per day/**Biomechanical** | 12-months prevalence of low back pain |
| Hubscher, 2014[7] (Australia) | Cross-sectional Study | 486 twins (277 females), ages 18-65 years. | Age, sex, smoking history | Yes, 57 | No | Vigorous gardening or heavy work around the yard | Age, Sex and smoking history | **OR, Total time** spent in domestic PA dichotomized as (more than 2 hours, less than 2 hours) | 1-month prevalence of self-reported Low Back pain |
| Josephson  2003[8] (Sweden) | Case-Control Study | 320 cases with low back pain  873 controls | Age, number of children, income, type of occupation, number of children | Yes, 100 | NA | Cleaning, carrying children, maintenance work, care of elderly parents | Psychosocial and physical factors of paid work, socio-demographic factors, and previous symptoms of LBP in the past three months | RR, Far too much and too little time on domestic work per day/**Time** | Clinically diagnosed low back pain |
| Rosano, 2004[9] (Italy) | Cross-sectional | 317 people, mean age=48.7 years, education, occupation | Sex, age, education | Yes, 96 | No | Making beds sewing cooking, cleaning, washing clothes/utensils, care giving, pet care | Age, education and occupation | OR, Self-reported frequency of domestic task per week/ **Frequency** | Self-reported low back pain |
| Malta  (2017)[10]  Brazil | Cross-sectional | 64,348 households | Age, education, race, residence, smoking, alcohol, BMI | No (can’t tell) | Yes | Heavy physical work at home, time spent on heavy physical activity at home | Age and education | OR, heavy physical domestic activity (Yes or No), /**work intensity** | Self-reported chronic back pain |
| Ranasinghe (2016)[11]  Sri Lanka | Cross-sectional | 1102 housewives | Age, marital status, number of children under-5, house ownership status, | Yes, 100 | NA | Cooking, handwash clothes, ironing, sweeping, shopping, childcare, cleaning | Child <5, married more than 10years, family income, self-rated health, psychosocial factors, long term illness | OR, working occasionally awkward versus working all the time in awkward postures/ **Biomechanical** | Self-reported low back pain |

**Additional File, Table 2.** Risk of Bias and Overall Quality Rating using the New Castle Ottawa Scale

| **Study** | **Study design** | **Selection** | **Comparability** | **Exposure/outcome** | | **Overall score** | **Quality** |
| --- | --- | --- | --- | --- | --- | --- | --- |
| Alzaharani 2019 | Cross-sectional | **** | ** | ** | 8 | | High |
| Geere 2018 | Cross-sectional | *** | ** | ** | 7 | | Moderate |
| Ahlgren 2012 | Cross-sectional | **** | ** | ** | 8 | | High |
| Hubscher 2014 | Cross-sectional | **** | ** | ** | 8 | | High |
| Habib 2015 | Cross-sectional | *** | None | ** | 5 | | Low |
| Habib 2012 | Cross sectional | **** | ** | ** | 8 | | High |
| Josephson 2003 | Case-Control | *** | ** | ** | 7 | | Moderate |
| Fong 2008 | Cross-sectional | ** | ** | ** | 6 | | Moderate |
| Rosano 2004 | Cross-sectional | **** | * | ** | 7 | | Moderate |
| Malta 2017 | Cross-sectional | **** | ** | ** | 8 | | High |
| Ranasinghe 2016 | Cross-sectional | **** | ** | ** | 8 | | High |

**Additional File, Table 3.**  Quantifying Heterogeneity Between Study Sub-Groups

| **Sub-Groups** | **Q-Statistic** | ***p*-value** |
| --- | --- | --- |
| Country Status | 11.16 | 0.0008 |
| Exposure Definition | 7.48 | 0.02 |
| Women-Specific Population | 0.54 | 0.46 |

**Additional File, Table 4.** Excluded Studies

| **Excluded Studies** | **Reason for Exclusion** |
| --- | --- |
| Apostoli et al. 2012[12]; Sanders and Morse, 2005[13]; Vincent and Hocking 2013[14] | Did not present means to calculate effect estimates |
| Backhausen et al. 2019[15]; Biglarian et al. 2012[16] | Only pregnant women |
| Mundt et al. 1993[17] | Included a sample of women comprising <50% of the total sample |
| Altinel et al. 2008[18]; Fazli et al. 2016[19]; Gupta and Nandini 2015[20]; Kalra and Bhatnagar 2017[21] | Defined exposures based on a women’s role but not the PDDW |
| Croft et al. 1999[22]; Takahashi et al. 2018[23]; Yip et al. 2004[24] | Focused on or included elderly women |
| Cavallari et al. 2016[25]; Cheung et al. 2006[26]; Krause et al. 2005[27] | Focused on paid housekeeping |
| Kopec et al. 2004[28]; Picavet and Schouten 2000[29] | Did not describe the types of domestic tasks |
| Cezar-Vaz et al. 2015[30]; Fernández et al. 2000[31] | Focused on other health outcomes |
| S. Mattioli et al. 2009[32]; Tang et al. 1999[33] | Focused on MSDs besides BP |

**Additional File, Figure 1.** Baujat Plot showing significant contribution to heterogeneity by Alzaharani 2019 (top-right corner)


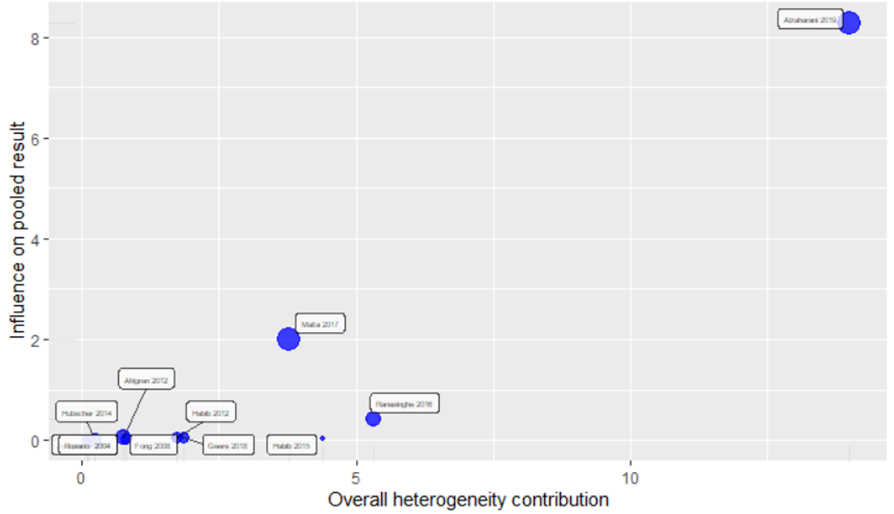


**Additional File, Figure 2.** Forest Plot with each study’s contribution to heterogeneity, omitted one at a time.


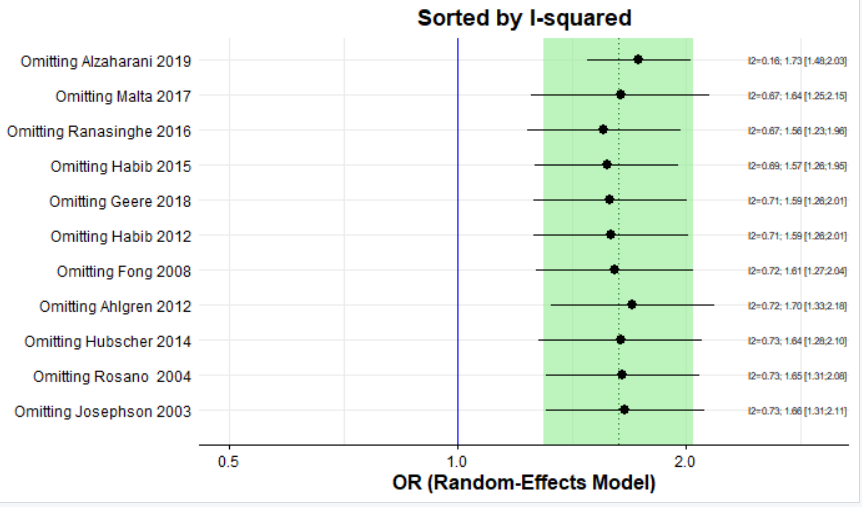


**Additional File, Figure 3.** Forest plot showing sensitivity analysis of high-quality studies, investigating the association between physically demanding domestic work and back pain in women


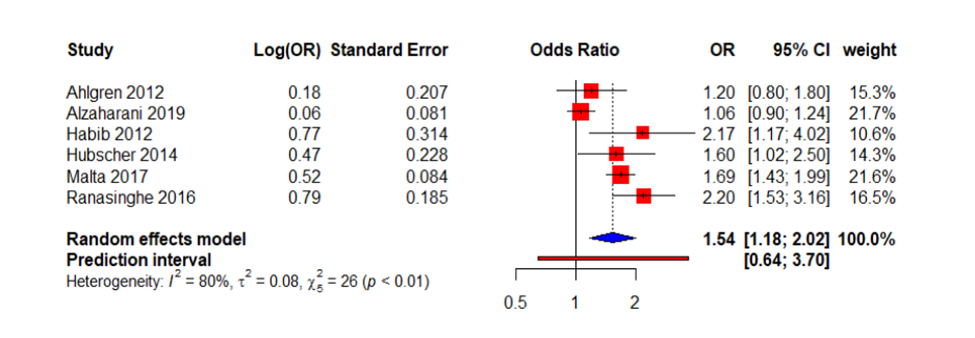


**Additional File, Figure 4.** Funnel plot


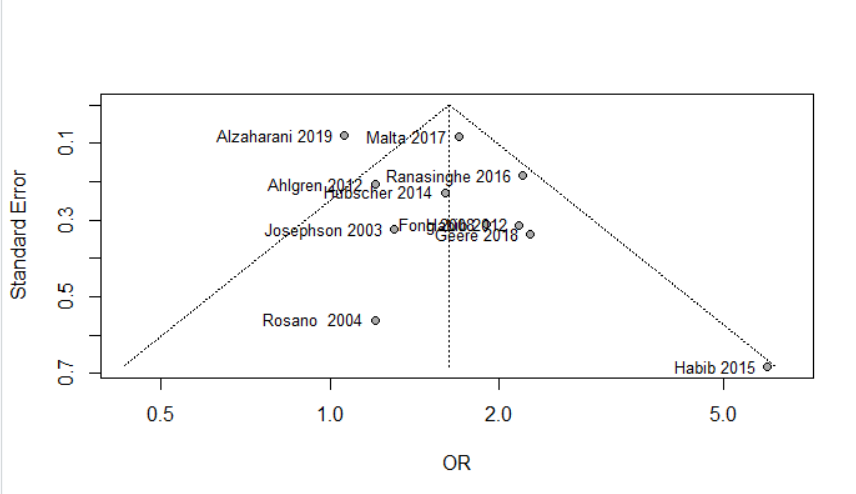


**Additional File, Appendix**

**PubMed**

**Population:** Housekeepers [All Fields] OR ("housekeeping"[MeSH Terms] OR "housekeeping"[All Fields] OR "housework"[All Fields]) OR homecare [All Fields] OR "domestic"[All Fields]) OR housewives [All Fields]

**Outcome:**(Musculoskeletal[All Fields] AND ("injuries"[Subheading] OR "injuries"[All Fields] OR "wounds and injuries"[MeSH Terms] OR ("wounds"[All Fields] AND "injuries"[All Fields]) OR "wounds and injuries"[All Fields])) OR ("musculoskeletal diseases"[MeSH Terms] OR ("musculoskeletal"[All Fields] AND "diseases"[All Fields]) OR "musculoskeletal diseases"[All Fields] OR ("musculoskeletal"[All Fields] AND "disorders"[All Fields]) OR "musculoskeletal disorders"[All Fields]) OR ("occupational injuries"[MeSH Terms] OR ("occupational"[All Fields] AND "injuries"[All Fields]) OR "occupational injuries"[All Fields]) OR (("upper extremity"[MeSH Terms] OR ("upper"[All Fields] AND "extremity"[All Fields]) OR "upper extremity"[All Fields]) AND ("injuries"[Subheading] OR "injuries"[All Fields] OR (("lower extremity"[MeSH Terms] OR ("lower"[All Fields] AND "extremity"[All Fields]) OR "lower extremity"[All Fields]) AND ("injuries"[Subheading] OR "injuries"[All Fields] OR "pain"[All Fields]) OR ("back pain"[MeSH Terms] OR ("low"[All Fields] AND "back"[All Fields] AND "pain"[All Fields]) OR "low back pain"[All Fields])

**Exposure:**(("ergonomics"[MeSH Terms] OR "ergonomics"[All Fields] OR "ergonomic"[All Fields]) AND ("risk"[MeSH Terms] OR "risk"[All Fields])) OR (("physical examination"[MeSH Terms] OR ("physical"[All Fields] AND "examination"[All Fields]) OR "physical examination"[All Fields] OR "physical"[All Fields]) AND load[All Fields]) OR ("lifting"[MeSH Terms] OR "lifting"[All Fields]) OR ("lifting"[MeSH Terms] OR "lifting"[All Fields] OR "carrying"[All Fields]) OR (("manuals as topic"[MeSH Terms] OR ("manuals"[All Fields] AND "topic"[All Fields]) OR "manuals as topic"[All Fields] OR "manual"[All Fields]) AND task[All Fields]) OR (("physical examination"[MeSH Terms] OR ("physical"[All Fields] AND "examination"[All Fields]) OR "physical examination"[All Fields] OR "physical"[All Fields]) AND ("risk"[MeSH Terms] OR "risk"[All Fields])) OR ("posture"[MeSH Terms] OR "posture"[All Fields])

**Embase:**

('housewife'/exp OR housewife OR 'housekeeping'/exp OR housekeeping OR 'cleaning'/exp OR cleaning OR 'household'/exp OR household OR 'home care'/exp OR 'home care' OR 'caregiver burden'/exp OR 'caregiver burden') AND ('musculoskeletal disease'/exp OR 'musculoskeletal disease' OR 'musculoskeletal pain'/exp OR 'musculoskeletal pain' OR 'injury'/exp OR injury OR 'occupational disease'/exp OR 'occupational disease' OR 'ergonomics'/exp OR ergonomics OR 'physical load'/exp OR 'physical load' OR (physical AND ('load'/exp OR load)) OR 'weight bearing'/exp OR 'weight bearing' OR 'manual labor'/exp OR 'manual labor' OR 'biomechanics'/exp OR biomechanics OR 'load carrying capacity'/exp OR 'load carrying capacity') AND 'human'/de AND ('cohort analysis'/de OR 'cross-sectional study'/de OR 'longitudinal study'/de OR 'prospective study'/de OR 'questionnaire

**REFERENCES**

1. Alzahrani H, Shirley D, Cheng SWM, Mackey M, Stamatakis E: **Physical activity and chronic back conditions: A population-based pooled study of 60,134 adults**. *Journal of Sport and Health Science* 2019.

2. Ahlgren C, Malmgren Olsson EB, Brulin C: **Gender analysis of musculoskeletal disorders and emotional exhaustion: interactive effects from physical and psychosocial work exposures and engagement in domestic work**. *Ergonomics* 2012, **55**(2):212-228.

3. Fong KN, Law CY: **Self-perceived musculoskeletal complaints: relationship to time use in women homemakers in Hong Kong**. *J Occup Rehabil* 2008, **18**(3):273-281.

4. Geere JA, Bartram J, Bates L, Danquah L, Evans B, Fisher MB, Groce N, Majuru B, Mokoena MM, Mukhola MS *et al*: **Carrying water may be a major contributor to disability from musculoskeletal disorders in low income countries: a cross-sectional survey in South Africa, Ghana and Vietnam**. *Journal of global health* 2018, **8**(1):010406.

5. Habib RR, El Zein K, Hojeij S: **Hard work at home: musculoskeletal pain among female homemakers**. *Ergonomics* 2012, **55**(2):201-211.

6. Habib MM, Rahman SU: **Musculoskeletal symptoms (MSS) and their associations with ergonomic physical risk factors of the women engaging in regular rural household activities: A picture from a rural village in Bangladesh**. *Work (Reading, Mass)* 2015, **50**(3):347-356.

7. Hubscher M, Ferreira ML, Junqueira DR, Refshauge KM, Maher CG, Hopper JL, Ferreira PH: **Heavy domestic, but not recreational, physical activity is associated with low back pain: Australian Twin low BACK pain (AUTBACK) study**. *Eur Spine J* 2014, **23**(10):2083-2089.

8. Josephson M, Ahlberg G, Harenstam A, Svensson H, Theorell T, Wiktorin C, Vingard E: **Paid and unpaid work, and its relation to low back and neck/shoulder disorders among women**. *Women & health* 2003, **37**(2):17-30.

9. Rosano A, Moccaldi R, Cioppa M, Lanzieri G, Persechino B, Spagnolo A: **[Musculoskeletal disorders and housework in Italy]**. *Annali di igiene : medicina preventiva e di comunita* 2004, **16**(3):497-507.

10. Malta DC, Oliveira MM, Andrade S, Caiaffa WT, Souza MFM, Bernal RTI: **Factors associated with chronic back pain in adults in Brazil**. *Rev Saude Publica* 2017, **51**(suppl 1):9s.

11. Ranasinghe PD, Atukorala I, Samaranayake A, Gunawardana NS: **SAT0504 Prevalence and Correlates of Household Work Related Musculoskeletal Disorders in Low Back Region among Sri Lankan Housewives**. *Annals of the Rheumatic Diseases* 2016, **75**(Suppl 2):852-852.

12. Apostoli P, Sala E, Curti S, Cooke RM, Violante FS, Mattioli S: **Loads of housework? Biomechanical assessments of the upper limbs in women performing common household tasks**. *Int Arch Occup Environ Health* 2012, **85**(4):421-425.

13. Sanders MJ, Morse T: **The Ergonomics of Caring for Children: An Exploratory Study**. *American Journal of Occupational Therapy* 2005, **59**(3):285-295.

14. Vincent R, Hocking C: **Factors that might give rise to musculoskeletal disorders when mothers lift children in the home**. *Physiother Res Int* 2013, **18**(2):81-90.

15. Backhausen MG, Bendix JM, Damm P, Tabor A, Hegaard HK: **Low back pain intensity among childbearing women and associated predictors. A cohort study**. *Women Birth* 2019, **32**(4):e467-e476.

16. Biglarian A, Seifi B, Bakhshi E, Mohammad K, Rahgozar M, Karimlou M, Serahati S: **Low back pain prevalence and associated factors in Iranian population: findings from the national health survey**. *Pain Res Treat* 2012, **2012**:653060.

17. Mundt DJ, Kelsey JL, Golden AL, Pastides H, Berg AT, Sklar J, Hosea T, Panjabi MM: **An epidemiologic study of non-occupational lifting as a risk factor for herniated lumbar intervertebral disc. The Northeast Collaborative Group on Low Back Pain**. *Spine* 1993, **18**(5):595-602.

18. Altinel L, Kose KC, Ergan V, Isik C, Aksoy Y, Ozdemir A, Toprak D, Dogan N: **[The prevalence of low back pain and risk factors among adult population in Afyon region, Turkey]**. *Acta orthopaedica et traumatologica turcica* 2008, **42**(5):328-333.

19. Fazli B, Ansari H, Noorani M, Jafari SM, Sharifpoor Z, Ansari S: **The Prevalence of Musculoskeletal Disorders and its Predictors among Iranians’ Housewives**. *International Journal of Epidemiologic Research* 2016, **3**(1):53-62.

20. Gupta G, Nandini N: **Prevalence of low back pain in non working rural housewives of Kanpur, India**. *International journal of occupational medicine and environmental health* 2015, **28**(2):313-320.

21. Kalra S, Bhatnagar B: **Prevalence of Musculoskeletal Disorder among Housewives**. In*: 2017*; 2017.

22. Croft PR, Papageorgiou AC, Thomas E, Macfarlane GJ, Silman AJ: **Short-term physical risk factors for new episodes of low back pain. Prospective evidence from the South Manchester Back Pain Study**. *Spine* 1999, **24**(15):1556-1561.

23. Takahashi A, Kitamura K, Watanabe Y, Kobayashi R, Saito T, Takachi R, Kabasawa K, Oshiki R, Tsugane S, Iki M *et al*: **Epidemiological profiles of chronic low back and knee pain in middle-aged and elderly japanese from the Murakami cohort**. *Journal of Pain Research* 2018, **11**:3161-3169.

24. Yip YB, Ho SC, Chan SG: **Identifying risk factors for low back pain (LBP) in Chinese middle-aged women: a case-control study**. *Health care for women international* 2004, **25**(4):358-369.

25. Cavallari JM, Ahuja M, Dugan AG, Meyer JD, Simcox N, Wakai S, Garza JL: **Differences in the prevalence of musculoskeletal symptoms among female and male custodians**. *American journal of industrial medicine* 2016, **59**(10):841-852.

26. Cheung K, Gillen M, Faucett J, Krause N: **The prevalence of and risk factors for back pain among home care nursing personnel in Hong Kong**. *American Journal of Industrial Medicine* 2006, **49**(1):14-22.

27. Krause N, Scherzer T, Rugulies R: **Physical workload, work intensification, and prevalence of pain in low wage workers: Results from a participatory research project with hotel room cleaners in Las Vegas**. *American Journal of Industrial Medicine* 2005, **48**(5):326-337.

28. Kopec JA, Sayre EC, Esdaile JM: **Predictors of Back Pain in a General Population Cohort**. *Spine* 2004, **29**(1):70-77.

29. Picavet HS, Schouten JS: **Physical load in daily life and low back problems in the general population-The MORGEN study**. *Preventive medicine* 2000, **31**(5):506-512.

30. Cezar-Vaz MR, Bonow CA, da Silva MR: **Mental and Physical Symptoms of Female Rural Workers: Relation between Household and Rural Work**. *International journal of environmental research and public health* 2015, **12**(9):11037-11049.

31. Fernández E, Schiaffino A, Martí M: **Influencia del trabajo doméstico sobre la salud y la utilización de servicios sanitarios en mujeres con trabajo remunerado y amas de casa**. *Gaceta Sanitaria* 2000, **14**(4):287-290.

32. Mattioli S, Baldasseroni A, Bovenzi M, Curti S, Cooke RMT, Campo G, Barbieri PG, Ghersi R, Broccoli M, Cancellieri MP *et al*: **Risk factors for operated carpal tunnel syndrome: a multicenter population-based case-control study**. *BMC public health* 2009, **9**:343-343.

33. Tang X, Zhuang L, Lu Z: **Carpal tunnel syndrome: a retrospective analysis of 262 cases and a one to one matched case-control study of 61 women pairs in relationship between manual housework and carpal tunnel syndrome**. *Chinese medical journal* 1999, **112**(1):44-48.
